# Supplementary material for: Predictors of Online Cancer Prevention Information Seeking Among Patients and Caregivers Across the Digital Divide: A Cross-Sectional, Correlational Study
Source: PubMed Central journal article supplement (PMC5369630; doi:10.2196/cancer.5108), 2016-03-09
Supplement: cancer_v2i1e2_app1.pdf [file cancer_v2i1e2_app1.pdf]

Table 2. Online and offline CPI seeking among cancer patients and relatives

|                                | Citing CPI Seeking Sources |             |             |             | Sig. (p) | Actual CPI Seeking    |             |             |             | Sig. (p) |
|--------------------------------|----------------------------|-------------|-------------|-------------|----------|-----------------------|-------------|-------------|-------------|----------|
|                                | Online                     |             | Offline     |             |          | Online                |             | Offline     |             |          |
|                                | N                          | %           | N           | %           |          | N                     | %           | N           | %           |          |
| <b>Overall</b>                 | <b>112</b>                 | <b>45</b>   | <b>137</b>  | <b>55</b>   |          |                       |             |             |             |          |
| <b>Gender</b>                  |                            |             |             |             | .36      |                       |             |             |             | .012     |
| Women                          | 74                         | 47          | 83          | 53          |          | 30                    | 35          | 55          | 65          |          |
| Men                            | 38                         | 41          | 55          | 60          |          | 28                    | 58          | 20          | 42          |          |
| <b>Patient/caregiver</b>       |                            |             |             |             | .05      |                       |             |             |             | .38      |
| Patient                        | 56                         | 39          | 87          | 61          |          | 34                    | 47          | 38          | 43          |          |
| Caregiver                      | 56                         | 52          | 52          | 48          |          | 24                    | 39          | 37          | 61          |          |
| <b>Marital status</b>          |                            |             |             |             | .15      |                       |             |             |             | .37      |
| Married/live with a partner    | 71                         | 48          | 76          | 52          |          | 31                    | 41          | 45          | 51          |          |
| Not married                    | 39                         | 39          | 61          | 61          |          | 27                    | 50          | 27          | 50          |          |
| <b>Race/Ethnicity</b>          |                            |             |             |             | .00      |                       |             |             |             | .146     |
| Hispanic-English speaking      | 64                         | 50          | 64          | 50          |          | 27                    | 41          | 39          | 59          |          |
| Hispanic-Spanish speaking      | 4                          | 10          | 34          | 90          |          | 8                     | 62          | 5           | 38          |          |
| Native American                | 6                          | 35          | 11          | 65          |          | 6                     | 67          | 3           | 33          |          |
| Non-Hispanic White             | 35                         | 60          | 23          | 40          |          | 13                    | 33          | 26          | 67          |          |
| Other                          | 3                          | 30          | 7           | 70          |          | 4                     | 67          | 2           | 33          |          |
| <b>Education*</b>              |                            |             |             |             | .00      |                       |             |             |             | .00      |
| Less than high school          | 5                          | 10          | 47          | 90          |          | 13                    | 93          | 1           | 7           |          |
| High school graduate           | 26                         | 45          | 33          | 56          |          | 14                    | 61          | 39          | 9           |          |
| Some college/training          | 43                         | 52          | 40          | 48          |          | 20                    | 35          | 37          | 65          |          |
| College graduate               | 37                         | 67          | 18          | 33          |          | 11                    | 29          | 27          | 71          |          |
| <b>Annual household income</b> |                            |             |             |             | .00      |                       |             |             |             | .003     |
| <\$20,000                      | 34                         | 29          | 83          | 71          |          | 33                    | 61          | 21          | 39          |          |
| \$20,001-\$35,000              | 17                         | 44          | 22          | 56          |          | 8                     | 40          | 12          | 60          |          |
| \$50,001-\$70,000              | 19                         | 66          | 10          | 34          |          | 8                     | 44          | 10          | 56          |          |
| >\$70,001                      | 27                         | 71          | 11          | 29          |          | 4                     | 15          | 23          | 85          |          |
| <b>Medical insurance</b>       |                            |             |             |             | .023     |                       |             |             |             | 1.00     |
| Insured                        | 96                         | 48          | 103         | 52          |          | 62                    | 56          | 48          | 44          |          |
| Uninsured                      | 14                         | 29          | 34          | 70          |          | 13                    | 56          | 10          | 43          |          |
| <b>Language of survey</b>      |                            |             |             |             | .00      |                       |             |             |             | .24      |
| English                        | 108                        | 51          | 105         | 49          |          | 50                    | 42          | 70          | 58          |          |
| Spanish                        | 4                          | 10          | 34          | 90          |          | 8                     | 82          | 5           | 38          |          |
|                                | <b>Mean</b>                | <b>Std.</b> | <b>Mean</b> | <b>Std.</b> |          | <b>Mean</b>           | <b>Std.</b> | <b>Mean</b> | <b>Std.</b> |          |
| <b>Age (Mean in years)</b>     | 51.24                      | 12.56       | 55.83       | .12.1       | .01      | 52.8                  | 12.64       | 55.45       | 12.64       | .12      |
| <b>Months since diagnosis</b>  | 32.10                      | 42.45       | 29.4        | 38.46       | .60      | 32.94                 | 38.22.      | 26.72       | 35.22       | .34      |
| <b>Health Status</b>           | 2.73                       | .99         | 3.17        | 1.01        | .001     | 2.60                  | .92         | 3.13        | .96         | .002     |
| <b>(1=excellent)</b>           |                            |             |             |             |          |                       |             |             |             |          |
| <b>Previous CPI seeking</b>    |                            |             |             |             | .25      | <b>Not applicable</b> |             |             |             |          |
| CPI seeker                     | 64                         | 48          | 68          | 52          |          |                       |             |             |             |          |
| Non CPI seeker                 | 46                         | 41          | 67          | 59          |          |                       |             |             |             |          |
| <b>Previous online CPI</b>     |                            |             |             |             | .00      | <b>Not applicable</b> |             |             |             |          |
| <b>seeking</b>                 |                            |             |             |             |          |                       |             |             |             |          |
| Past online CPI seeking        | 46                         | 72          | 18          | 28          |          |                       |             |             |             |          |
| Past offline CPI seeker        | 18                         | 28          | 40          | 59          |          |                       |             |             |             |          |
| <b>CPI Importance</b>          | 4.28                       | .92         | 4.50        | .711        | .03      | 4.41                  | .91         | 4.5         | .67         | .31      |
| <b>Prevention orientation</b>  | 4.17                       | .537        | 4.35        | .47         | .006     | 4.25                  | .50         | 4.42        | .44         | .037     |

|                                                        |                       |      |     |      |     |      |
|--------------------------------------------------------|-----------------------|------|-----|------|-----|------|
| <b>Experiences of CPI seeking (5 = Most difficult)</b> | <b>Not applicable</b> | 3.59 | .46 | 3.67 | .51 | .327 |
|--------------------------------------------------------|-----------------------|------|-----|------|-----|------|
