# Supplementary material for: Predictors of Online Cancer Prevention Information Seeking Among Patients and Caregivers Across the Digital Divide: A Cross-Sectional, Correlational Study
Source: PubMed Central journal article supplement (PMC5369630; doi:10.2196/cancer.5108), 2016-03-09
Supplement: cancer_v2i1e2_app2.pdf [file cancer_v2i1e2_app2.pdf]

Table 3 Logistic regression analysis predicting digital divide in citing the Internet as CPI carrier among cancer patients and relatives

| Variable                | $\beta$ | S.E.  | Wald   | df | Sig. | Exp( $\beta$ ) | 95% CI. For exp $\beta$ |        |
|-------------------------|---------|-------|--------|----|------|----------------|-------------------------|--------|
|                         |         |       |        |    |      |                | Lower                   | Upper  |
| Age                     | .032    | .012  | 6.441  | 1  | .011 | 1.032          | 1.007                   | 1.058  |
| General health          | .181    | .167  | 1.183  | 1  | .277 | 1.199          | .865                    | 1.662  |
| Patient/relative        | .188    | .321  | .344   | 1  | .557 | 1.207          | .643                    | 2.266  |
| Education               |         |       | 16.713 | 3  | .001 |                |                         |        |
| < high school graduate  | 2.464   | .626  | 15.499 | 1  | .000 | 11.750         | 3.446                   | 40.064 |
| High school graduate    | 1.095   | .452  | 5.880  | 1  | .015 | 2.989          | 1.234                   | 7.244  |
| Some college/training   | .621    | .404  | 2.360  | 1  | .124 | 1.860          | .843                    | 4.105  |
| Race/ethnicity          |         |       | 8.577  | 4  | .073 |                |                         |        |
| Native American         | -.411   | .839  | .240   | 1  | .624 | .663           | .128                    | 3.434  |
| Other                   | -.466   | .963  | .235   | 1  | .628 | .627           | .095                    | 4.141  |
| Non-Hispanic White      | -       | .701  | 4.574  | 1  | .032 | .223           | .057                    | .882   |
| Latino, English speaker | -       | .638  | 4.433  | 1  | .035 | .261           | .075                    | .911   |
| Prevention orientation  | .603    | .307  | 3.849  | 1  | .050 | 1.827          | 1.001                   | 3.335  |
| Constant                | 5.925   | 1.602 | 13.681 | 1  | .000 | 374.2          |                         |        |

R<sup>2</sup> (Nagelkerke) .319
